# Supplementary material for: Spontaneous current constriction in threshold switching devices
Source: PubMed Central journal article supplement (PMC6456614; doi:10.1038/s41467-019-09679-9), 2019-04-09
Supplement: 41467_2019_9679_MOESM1_ESM.pdf [file 41467_2019_9679_MOESM1_ESM.pdf]

# Spontaneous current constriction in threshold switching devices

*Goodwill et al.*

## Supplementary Information

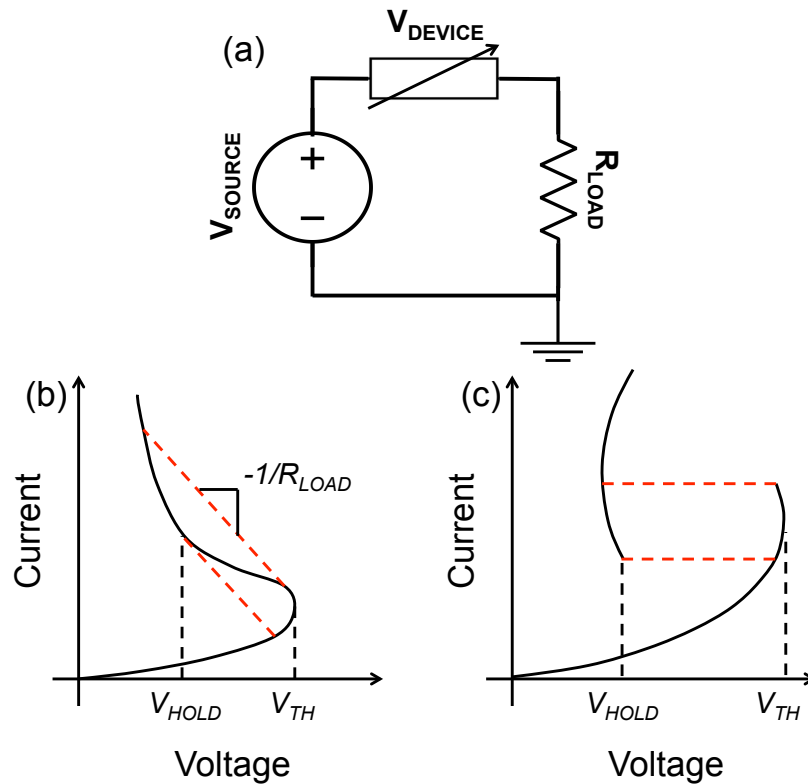

Supplementary Figure 1. Schematic of testing set-up and observed  $TaO_x$   $I-V$  characteristics. (a) Electrical testing circuit layout for  $I-V$  characterization and SJEM. Schematic of (b) S-NDR  $I-V$  and (c) multivalued  $I-V$ .

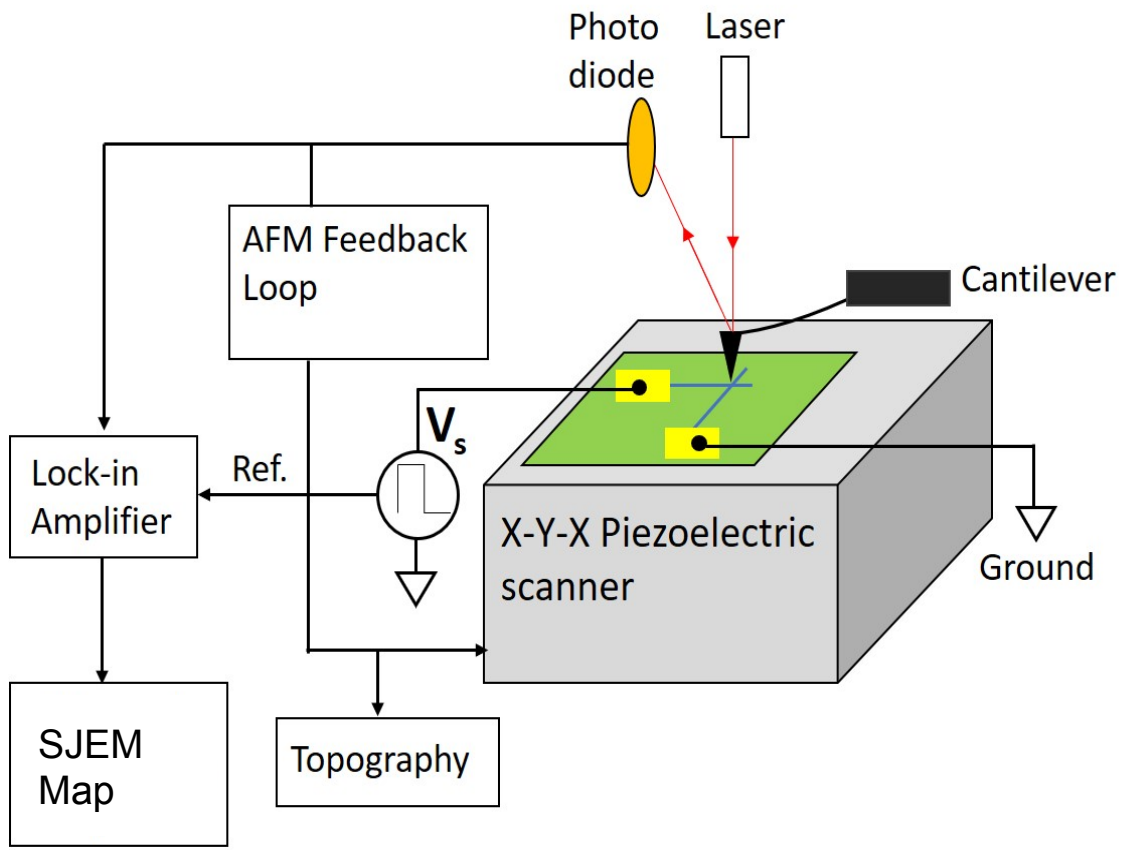

Supplementary Figure 2. Schematic of SJEM measurement setup.

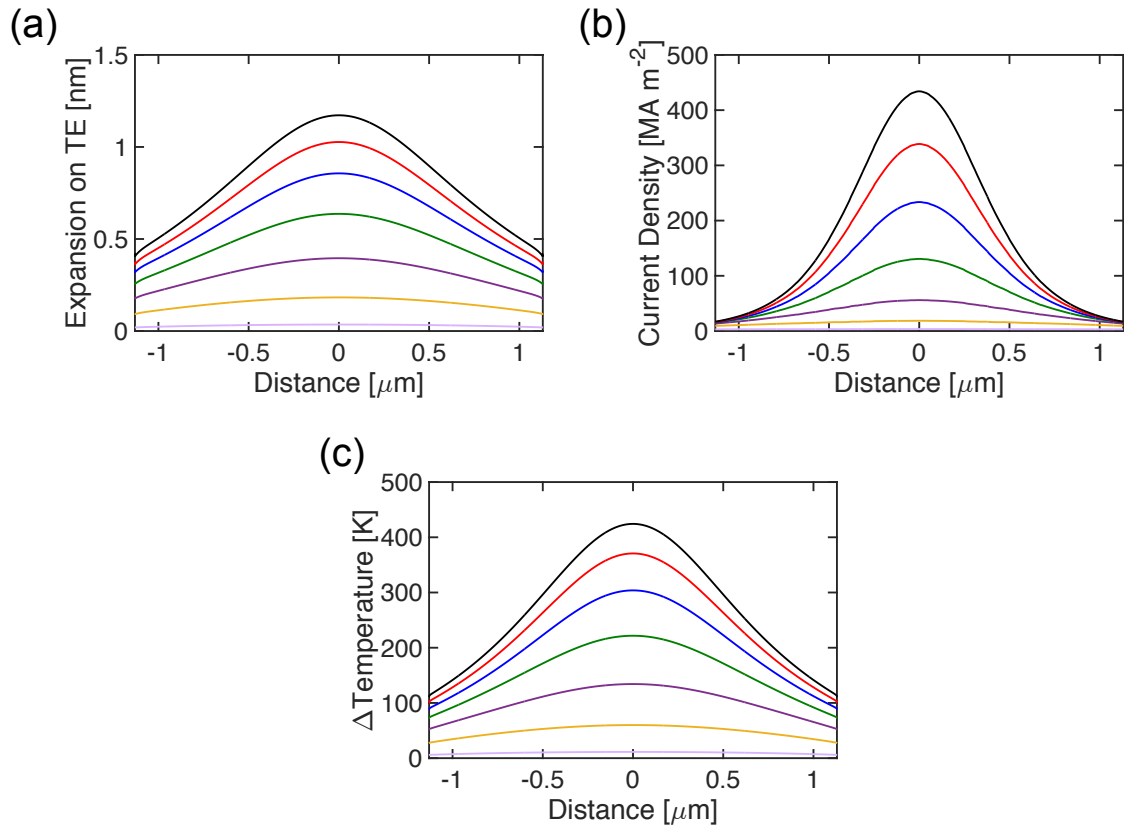

Supplementary Figure 3. Simulated characteristics of a  $2 \times 2 \mu\text{m}$  TaO<sub>x</sub> device. Simulated line profiles of (a) expansion (b) current density and (c) temperature for all points of equal power dissipation along the  $I$ - $V$  shown in Figure 2(b). Source data are provided as a Source Data file.

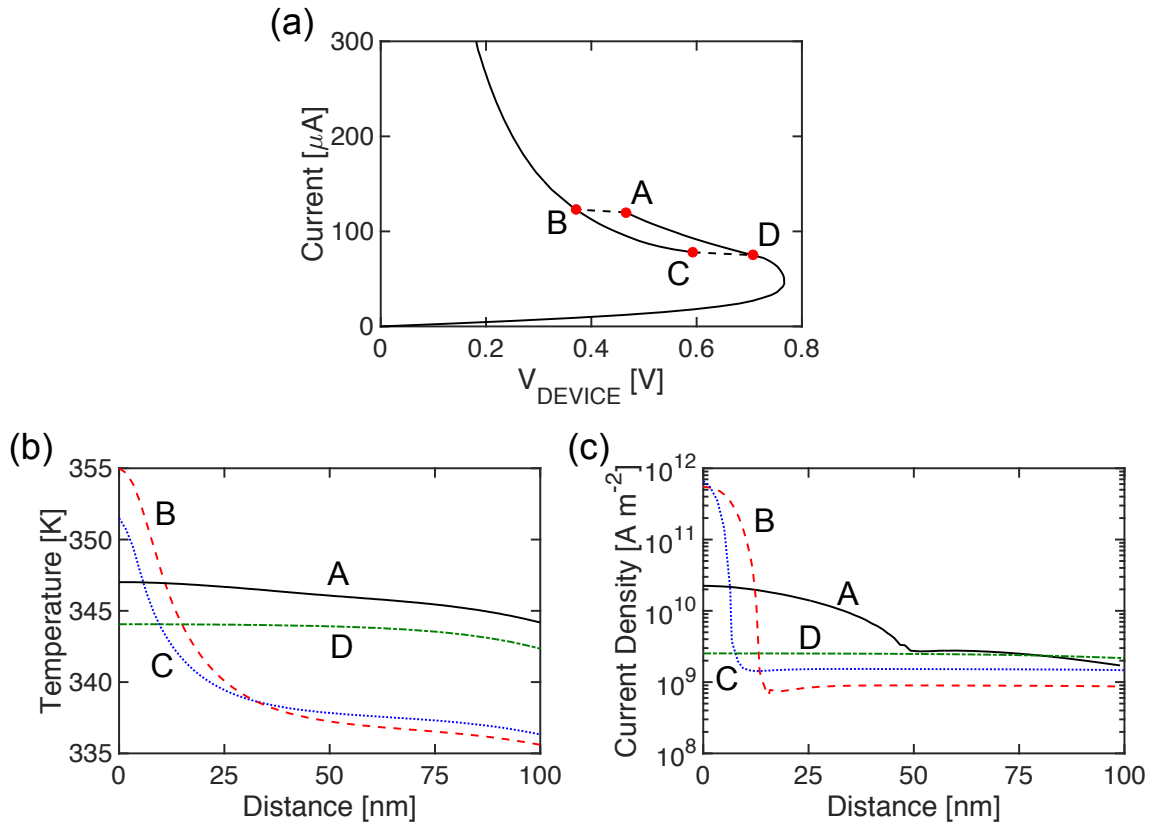

Supplementary Figure 4. Simulated characteristics of a 200 nm diameter VO<sub>2</sub> device. (a) Simulated  $I$ - $V$  for VO<sub>2</sub>-based device with current source, shown for reference from Figure 5. (b) Temperature and (c) current density line profiles in the device shown for points A-D along the  $I$ - $V$  curve. Source data are provided as a Source Data file.

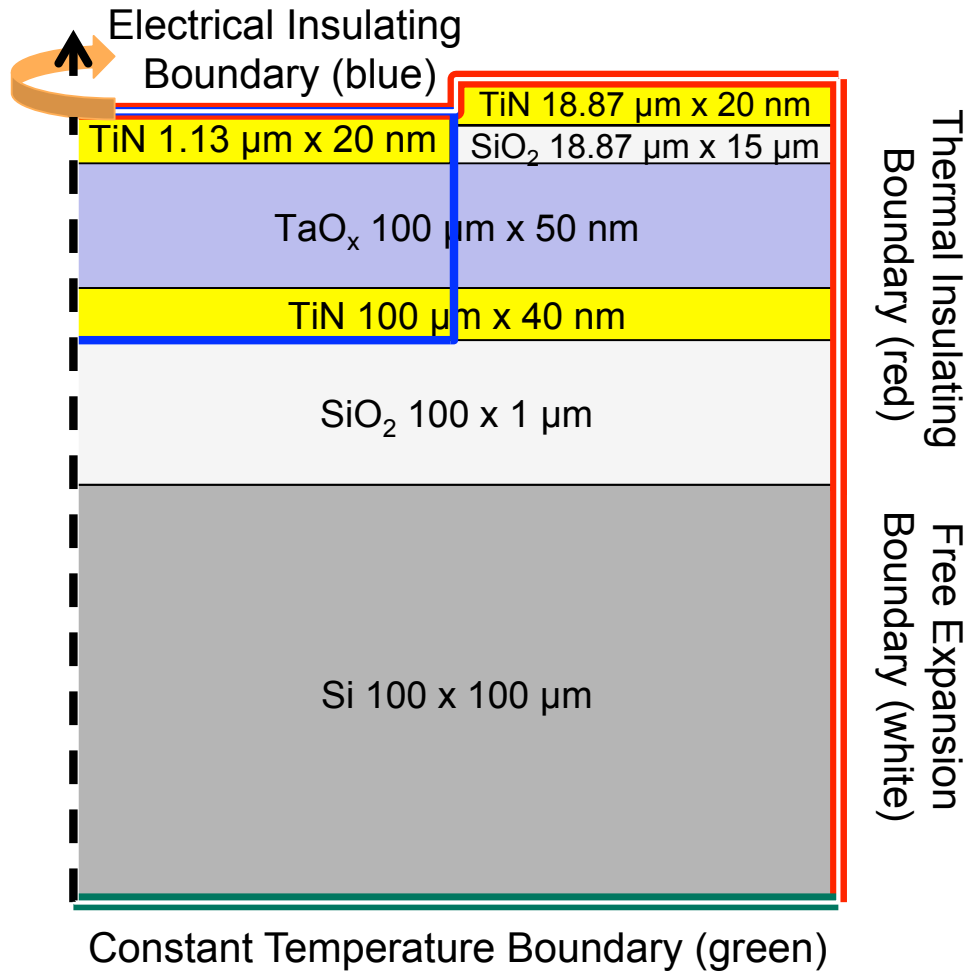

Supplementary Figure 5. Device structure and boundary conditions used in simulation. The dimensions shown for each layer are indicated as width  $\times$  height.

Supplementary Table 1. Material properties used in simulation.

|                                                               | Si                   | SiO <sub>2</sub>     | TiN <sup>1</sup>       | TaO <sub>x</sub> <sup>1</sup> |
|---------------------------------------------------------------|----------------------|----------------------|------------------------|-------------------------------|
| Density<br>(kg·m <sup>-3</sup> )                              | 2329                 | 2200                 | 5210                   | 8200                          |
| Thermal conductivity<br>(W·m <sup>-1</sup> ·K <sup>-1</sup> ) | 130                  | 1.4                  | 5                      | 4                             |
| Electrical conductivity<br>(S·m <sup>-1</sup> )               | N/A                  | N/A                  | 5×10 <sup>6</sup>      | User defined                  |
| Heat capacity<br>(J·kg <sup>-1</sup> ·K <sup>-1</sup> )       | 700                  | 730                  | 545                    | 174                           |
| Relative permittivity                                         | N/A                  | N/A                  | 4                      | 22                            |
| Thermal expansion<br>coefficient<br>(1/K)                     | 2.6×10 <sup>-6</sup> | 0.5×10 <sup>-6</sup> | 1.0×10 <sup>-5 2</sup> | 5.0×10 <sup>-6 3</sup>        |
| Young's Modulus<br>(GPa)                                      | 170                  | 70                   | 300 <sup>2</sup>       | 179 <sup>3</sup>              |
| Poisson's Ratio                                               | 0.28                 | 0.17                 | 0.25 <sup>2</sup>      | 0.27 <sup>3</sup>             |

## Supplementary References

1. Goodwill, J. M., Sharma, A. A., Li, D., Bain, J. A. & Skowronski, M. Electro-Thermal Model of Threshold Switching in TaO<sub>x</sub>-Based Devices. *ACS Appl. Mater. Interfaces* **9**, 11704–11710 (2017).
2. Cen, Z. H. *et al.* Temperature effect on titanium nitride nanometer thin film in air. *J. Phys. D. Appl. Phys.* **50**, (2017).
3. Braginsky, V. B. & Samoilenko, A. A. Measurements of the optical mirror coating properties. *Phys. Lett. A* **315**, 175–177 (2003).
